# Supplementary material
Source: PubMed Central journal article supplement (PMC10523173)

## Supplemental Online Content

Lugar M, Eugster A Achenbach P, et al. SARS-CoV-2 infection and development of islet autoimmunity in early childhood. *JAMA*. doi:10.1001/jama.2023.16348

**eTable 1.** Age and Period of Follow-up Visits in 885 Children of Study

**eTable 2.** Characteristics of Children Included in Follow-up SARS-CoV-2 Antibody Measurements

**eTable 3.** Temporal Development of Islet Autoantibodies in Relation to SARS-CoV-2 Antibodies at Age 12 to 16 months

**eFigure 1.** Linear Schematic of Constructs Encoding Antigens Fused to Nanoluc Used in the Luciferase Immunoprecipitation System (LIPS) Assay

**eFigure 2.** Examples of SARS-CoV-2 (A) and H1N1 Antibody Titres (B,C) Over Time in Children

**eFigure 3.** Children in POInT Study Tested in the Ancillary Study

**eFigure 4.** Incidence of SARS-CoV-2 Antibodies during the Pandemic Period (A) at Different Study Sites (B)

This supplemental material has been provided by the authors to give readers additional information about their work.

**eTable 1.** Age and Period of Follow-up Visits in 885 Children of Study

| <b>Visit No.</b> | <b>Visit Age, Months<br/>(Median, IQR)</b> | <b>Visit Date<br/>(Median, Range, Month/Year)</b> | <b>Total Period<br/>(n, Children)</b> | <b>After June 2020<br/>(n, Children)</b> |
|------------------|--------------------------------------------|---------------------------------------------------|---------------------------------------|------------------------------------------|
| 2                | 8.0 (7.3 – 8.5)                            | 4/2020 (4/2018 to 6/2021)                         | 885                                   | 333                                      |
| 3                | 10.0 (9.2 – 10.4)                          | 6/2020 (6/2018 to 8/2021)                         | 885                                   | 391                                      |
| 4                | 13.9 (13.2 – 14.4)                         | 9/2020 (10/2018 to 11/2021)                       | 885                                   | 536                                      |
| 5                | 18.0 (17.9 – 18.2)                         | 1/2021 (1/2019 to 5/2022)                         | 881                                   | 637                                      |
| 6                | 24.0 (23.8 – 24.2)                         | 6/2021 (7/2019 to 6/2022)                         | 765                                   | 624                                      |

**eTable 2.** Characteristics of Children Included in Follow-up SARS-CoV-2 Antibody Measurements

|                           | <b>Total Study Period</b> | <b>After June 2020</b> |
|---------------------------|---------------------------|------------------------|
|                           | <b>n = 885</b>            | <b>n = 747</b>         |
| Sex, Girls/Boys           | 441/444                   | 364/383                |
| T1D First Degree Relative | 477                       | 384                    |
| Country                   |                           |                        |
| - Germany                 | 407                       | 306                    |
| - Poland                  | 216                       | 187                    |
| - Sweden                  | 160                       | 153                    |
| - Belgium                 | 71                        | 71                     |
| - United Kingdom          | 31                        | 30                     |
| HLA DR3/DR4-DQ8           | 478                       | 416                    |

eTable3. Temporal Development of Islet Autoantibodies in Relation to SARS-CoV-2 Antibodies at Age 12 to 16 months.

| SARS-CoV-2 Antibody Development at Age 12 to 16 mo (visit 4) | Islet Autoantibody Positive at 12-16 mo (visit 4) | Islet Autoantibody Positive at 18 mo (visit 5) |
|--------------------------------------------------------------|---------------------------------------------------|------------------------------------------------|
|                                                              | Cases No./Total (%)                               | Cases No./Total (%)                            |
| Pre-pandemic (Until June 2020)                               |                                                   |                                                |
| - SARS-CoV-2 Ab Negative                                     | 8/341 (2.3%)                                      | 5/333 (1.5%)                                   |
| Pandemic (From July 2020)                                    |                                                   |                                                |
| - SARS-CoV-2 Ab Negative                                     | 7/480 (1.5%)                                      | 4/422 (0.9%)                                   |
| - SARS-CoV-2 Ab Positive                                     | 4/19 (21.1%) <sup>a</sup>                         | 2/15 (13.3%) <sup>b</sup>                      |

<sup>a</sup>  $P < .001$  vs SARS-CoV-2 antibody negative in pandemic period;  $P = .001$  vs SARS-CoV-2 antibody negative in whole period.

<sup>b</sup>  $P = .02$  vs SARS-CoV-2 antibody negative in pandemic period;  $P = .02$  vs SARS-CoV-2 antibody negative in whole period.

**eFigure 1.** Linear Schematic of Constructs Encoding Antigens Fused to NanoLuc Used in the Luciferase Immunoprecipitation System (LIPS) Assay

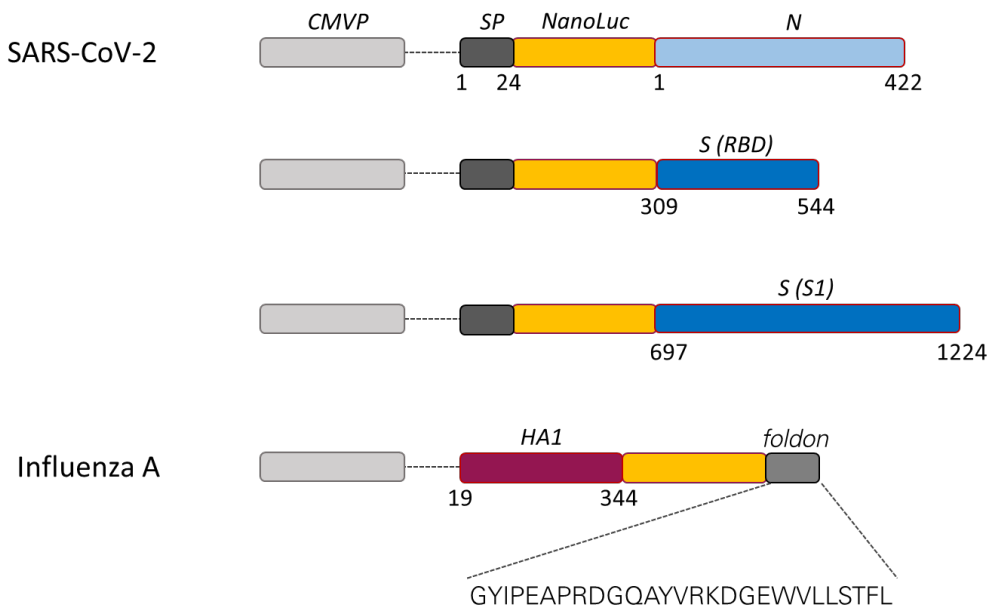

Linear schematic of constructs encoding recombinant SARS-COV-2 and Influenza A antigens fused to NanoLuc. All constructs are driven by the CMV-promotor. *SP*: *IL6* signal peptide; *N*: Nucleocapsid gene; *S*: Spike gene; *RBD*: receptor binding domain; *S1*: S1 part of spike gene; *HA1*: HA1 part of hemagglutinin; *foldon*: bacteriophage T4 fibrin foldon domain (encoded amino acids are shown). Numbers correspond to amino acids encoded.

**eFigure 2.** Examples of SARS-CoV-2 (A) and H1N1 Antibody Titres (B,C) Over Time in Children

**A**

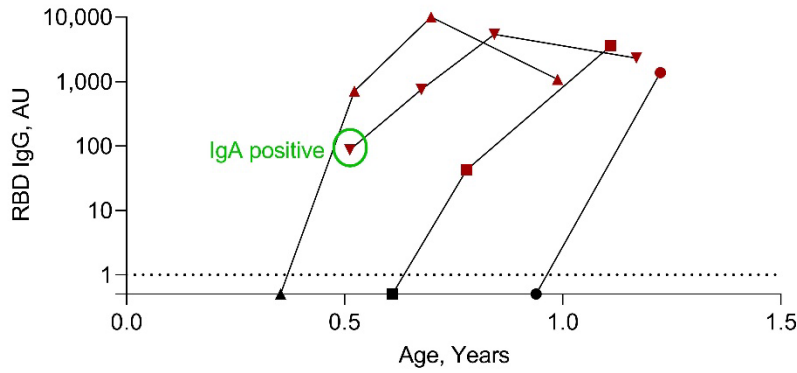

**B**

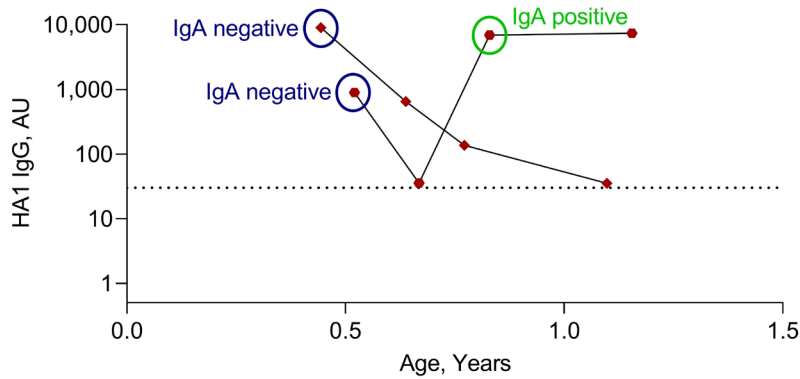

**C**

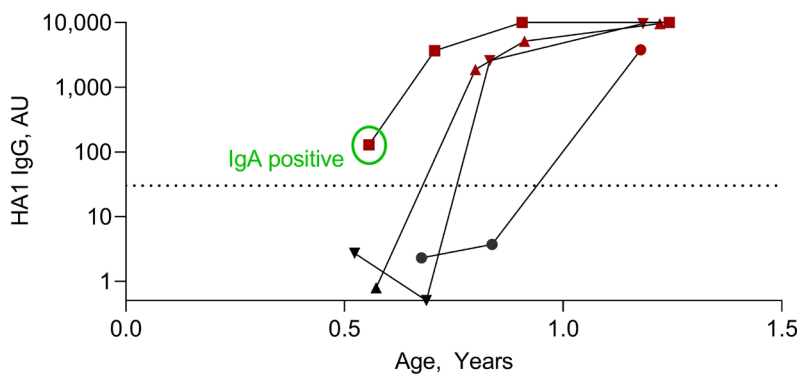

Dots connected with a line represent a set of samples of an individual child. Dashed lines show the threshold for antibody-positivity. Some samples were tested for IgA antibodies to distinguish the child's antibodies from the maternal ones (circled dot, green is IgA positive, blue is IgA negative).

**eFigure 3.** Children in POInT Study Tested in the Ancillary Study

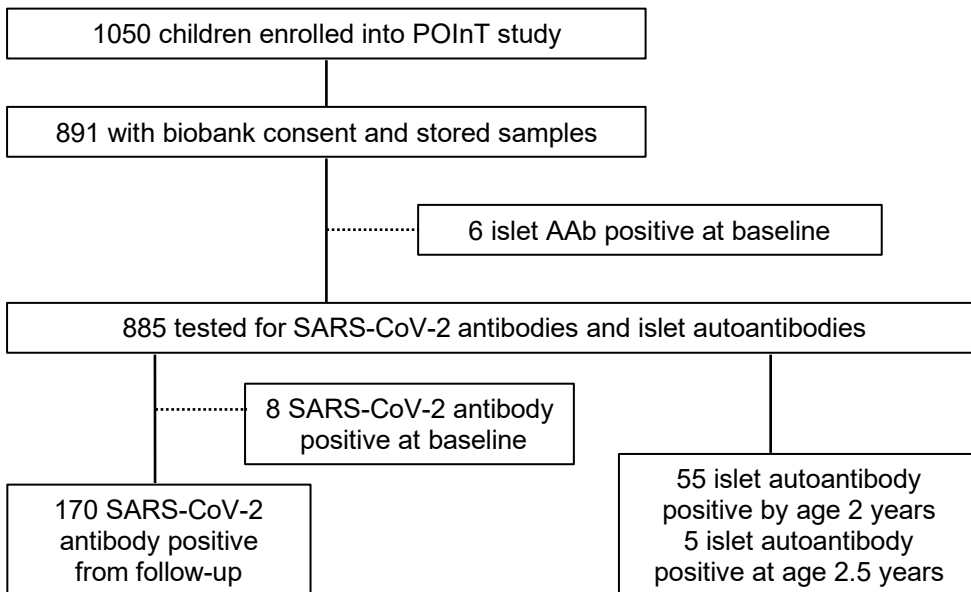

**eFigure 4.** Incidence of SARS-CoV-2 Antibodies during the Pandemic Period (A) at Different Study Sites (B)

**A**

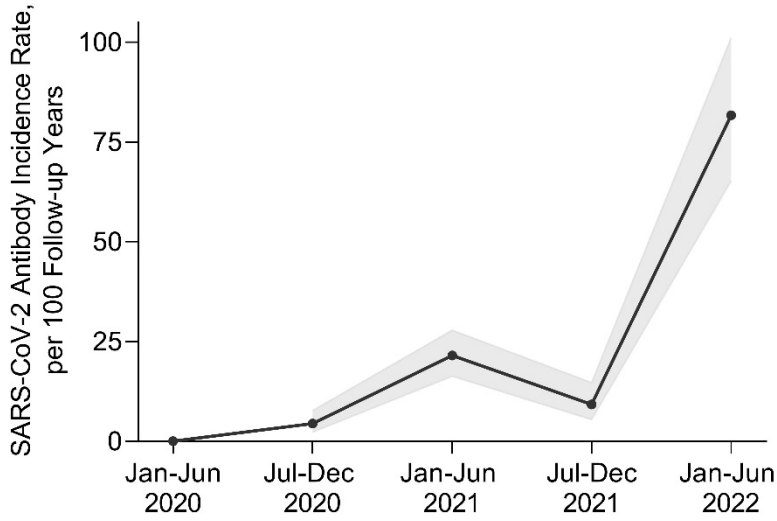

**B**

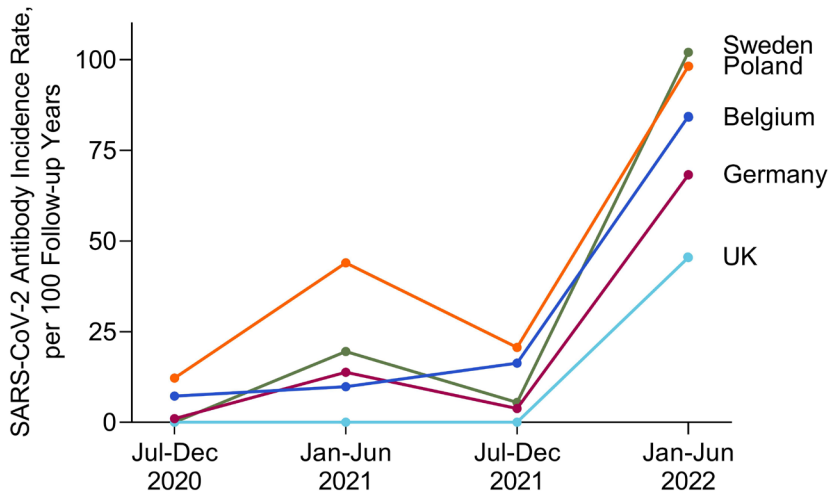

Supplement: jama-e2316348-s001.pdf [file jama-e2316348-s001.pdf]
