# Supplementary material
Source: PubMed Central journal article supplement (PMC10523173)
Supplement: jama-e2316348-s002.pdf [file jama-e2316348-s002.pdf]

\*First name, last name, and suffix (if applicable) are required and will appear in PubMed.

| <b>*Group Name(s): The GPPAD collaborators</b> |                   |                              |                         |                                                                                            |                                                 |                                                                |                                                                                                   |
|------------------------------------------------|-------------------|------------------------------|-------------------------|--------------------------------------------------------------------------------------------|-------------------------------------------------|----------------------------------------------------------------|---------------------------------------------------------------------------------------------------|
| <b>*First Name and Middle Initial(s)</b>       | <b>*Last Name</b> | <b>*Suffix (eg, Jr, III)</b> | <b>Academic Degrees</b> | <b>Institution</b>                                                                         | <b>Location (city, state/province, country)</b> | <b>Role or Contribution, eg, chair, principal investigator</b> | <b>Group (if more than 1 Group listed in the byline) and/or Subgroup (eg, Steering Committee)</b> |
| Melanie                                        | Gündert           |                              | Ph.D                    | Institute of Diabetes Research, Helmholtz Munich, German Center for Environmental Health   | Germany, Munich                                 | GPPAD Coordinating Center                                      |                                                                                                   |
| Florian                                        | Haupt             |                              | Ph.D                    | Institute of Diabetes Research, Helmholtz Munich, German Center for Environmental Health   | Germany, Munich                                 | GPPAD Coordinating Center                                      |                                                                                                   |
| Stefanie                                       | Arnolds           |                              | Dipl.-Biol.             | Institute of Diabetes Research, Helmholtz Munich, German Center for Environmental Health   | Germany, Munich                                 | GPPAD Coordinating Center                                      |                                                                                                   |
| Karina                                         | Blasius           |                              | L.L.M.                  | Institute of Diabetes Research, Helmholtz Munich, German Center for Environmental Health   | Germany, Munich                                 | GPPAD Coordinating Center                                      |                                                                                                   |
| Nadine                                         | Friedl            |                              | B.Sc., M.A.             | Institute of Diabetes Research, Helmholtz Munich, German Center for Environmental Health   | Germany, Munich                                 | GPPAD Coordinating Center                                      |                                                                                                   |
| Cigdem                                         | Gezginci          |                              |                         | Institute of Diabetes Research, Helmholtz Munich, German Center for Environmental Health   | Germany, Munich                                 | GPPAD Coordinating Center                                      |                                                                                                   |
| Gertrud                                        | Göppel            |                              |                         | Institute of Diabetes Research, Helmholtz Munich, German Center for Environmental Health   | Germany, Munich                                 | GPPAD Coordinating Center                                      |                                                                                                   |
| Martin                                         | Heigermoser       |                              |                         | Institute of Diabetes Research, Helmholtz Munich, German Center for Environmental Health   | Germany, Munich                                 | GPPAD Coordinating Center                                      |                                                                                                   |
| Maja                                           | Hergl             |                              |                         | Institute of Diabetes Research, Helmholtz Munich, German Center for Environmental Health   | Germany, Munich                                 | GPPAD Coordinating Center                                      |                                                                                                   |
| Bianca                                         | Höfelschweiger    |                              | Ph.D                    | Institute of Diabetes Research, Helmholtz Munich, German Center for Environmental Health   | Germany, Munich                                 | GPPAD Coordinating Center                                      |                                                                                                   |
| Manja                                          | Jolink            |                              | M.Sc.                   | Institute of Diabetes Research, Helmholtz Munich, German Center for Environmental Health   | Germany, Munich                                 | GPPAD Coordinating Center                                      |                                                                                                   |
| Krisztian                                      | Kisfűgedi         |                              |                         | Institute of Diabetes Research, Helmholtz Munich, German Center for Environmental Health   | Germany, Munich                                 | GPPAD Coordinating Center                                      |                                                                                                   |
| Nadine                                         | Klein             |                              | M.Sc.                   | Institute of Diabetes Research, Helmholtz Munich, German Center for Environmental Health   | Germany, Munich                                 | GPPAD Coordinating Center                                      |                                                                                                   |
| Claudia                                        | Matzke            |                              |                         | Institute of Diabetes Research, Helmholtz Munich, German Center for Environmental Health   | Germany, Munich                                 | GPPAD Coordinating Center                                      |                                                                                                   |
| Rebecca                                        | Niewöhner         |                              |                         | Institute of Diabetes Research, Helmholtz Munich, German Center for Environmental Health   | Germany, Munich                                 | GPPAD Coordinating Center                                      |                                                                                                   |
| Katharina                                      | Schütte-Borkovec  |                              | Dr.med. Vet             | Institute of Diabetes Research, Helmholtz Munich, German Center for Environmental Health   | Germany, Munich                                 | GPPAD Coordinating Center                                      |                                                                                                   |
| Andreas                                        | Weiß              |                              | M.Sc.                   | Institute of Diabetes Research, Helmholtz Munich, German Center for Environmental Health   | Germany, Munich                                 | GPPAD Coordinating Center                                      |                                                                                                   |
| José Maria                                     | Zapardiel Gonzalo |                              | M.Sc.                   | Institute of Diabetes Research, Helmholtz Munich, German Center for Environmental Health   | Germany, Munich                                 | GPPAD Coordinating Center                                      |                                                                                                   |
| Sarah                                          | Schmidt           |                              | Ph.D                    | Institute of Diabetes Research, Helmholtz Munich, German Center for Environmental Health   | Germany, Munich                                 | GPPAD Coordinating Center                                      |                                                                                                   |
| Merve                                          | Vurucu            |                              |                         | Institute of Diabetes Research, Helmholtz Munich, German Center for Environmental Health   | Germany, Munich                                 | GPPAD Coordinating Center                                      |                                                                                                   |
| Katharina                                      | Sarletti          |                              | M.Sc.                   | Institute of Diabetes Research, Helmholtz Munich, German Center for Environmental Health   | Germany, Munich                                 | GPPAD Coordinating Center                                      |                                                                                                   |
| Melanie                                        | Sporreiter        |                              |                         | Institute of Diabetes Research, Helmholtz Munich, German Center for Environmental Health   | Germany, Munich                                 | GPPAD Coordinating Center                                      |                                                                                                   |
| Stefanie                                       | Jacobson          |                              |                         | Institute of Diabetes Research, Helmholtz Munich, German Center for Environmental Health   | Germany, Munich                                 | GPPAD Coordinating Center                                      |                                                                                                   |
| Charlien                                       | Janssen           |                              | M.Sc.                   | Department of Pediatrics, University Hospitals Leuven                                      | Belgium, Leuven                                 | Clinical Center                                                |                                                                                                   |
| Hilde                                          | Morobé            |                              | R.N.                    | Department of Pediatrics, University Hospitals Leuven                                      | Belgium, Leuven                                 | Clinical Center                                                |                                                                                                   |
| Brontë                                         | Vrancken          |                              | M.Sc.                   | Department of Pediatrics, University Hospitals Leuven                                      | Belgium, Leuven                                 | Clinical Center                                                |                                                                                                   |
| Natalie                                        | Van den Driessche |                              | M.Sc.                   | Department of Pediatrics, University Hospitals Leuven                                      | Belgium, Leuven                                 | Clinical Center                                                |                                                                                                   |
| Gert                                           | Van Poel          |                              | M.Sc.                   | Department of Pediatrics, University Hospitals Leuven                                      | Belgium, Leuven                                 | Clinical Center                                                |                                                                                                   |
| Renka                                          | Van Heyste        |                              | R.N.                    | Department of Pediatrics, University Hospitals Leuven                                      | Belgium, Leuven                                 | Clinical Center                                                |                                                                                                   |
| Janne                                          | Houben            |                              | M.Psych                 | Department of Pediatrics, University Hospitals Leuven                                      | Belgium, Leuven                                 | Clinical Center                                                |                                                                                                   |
| Veerle                                         | Vanhuyse          |                              | B.Mus.                  | Department of Pediatrics, University Hospitals Leuven                                      | Belgium, Leuven                                 | Clinical Center                                                |                                                                                                   |
| Sari                                           | Arabi             |                              | M.D.                    | Faculty of Medicine, Center for Regenerative Therapies Dresden, Technische Universität Dre | Germany, Dresden                                | Clinical Center                                                |                                                                                                   |
| Lisa                                           | Barbknecht        |                              |                         | Faculty of Medicine, Center for Regenerative Therapies Dresden, Technische Universität Dre | Germany, Dresden                                | Clinical Center                                                |                                                                                                   |
| Sevina                                         | Dietz             |                              |                         | Faculty of Medicine, Center for Regenerative Therapies Dresden, Technische Universität Dre | Germany, Dresden                                | Clinical Center                                                |                                                                                                   |
| Franziska                                      | Ehrlich           |                              |                         | Faculty of Medicine, Center for Regenerative Therapies Dresden, Technische Universität Dre | Germany, Dresden                                | Clinical Center                                                |                                                                                                   |
| Zahra                                          | Gholizadeh        |                              |                         | Faculty of Medicine, Center for Regenerative Therapies Dresden, Technische Universität Dre | Germany, Dresden                                | Clinical Center                                                |                                                                                                   |
| Raphael                                        | Hoffmann          |                              | M.D.                    | Faculty of Medicine, Center for Regenerative Therapies Dresden, Technische Universität Dre | Germany, Dresden                                | Clinical Center                                                |                                                                                                   |
| Angela                                         | Hommel            |                              | Ph.D                    | Faculty of Medicine, Center for Regenerative Therapies Dresden, Technische Universität Dre | Germany, Dresden                                | Clinical Center                                                |                                                                                                   |
| Franziska                                      | Lange             |                              | M.D.                    | Faculty of Medicine, Center for Regenerative Therapies Dresden, Technische Universität Dre | Germany, Dresden                                | Clinical Center                                                |                                                                                                   |
| Anja                                           | Loff              |                              | Ph.D                    | Faculty of Medicine, Center for Regenerative Therapies Dresden, Technische Universität Dre | Germany, Dresden                                | Clinical Center                                                |                                                                                                   |
| Robert                                         | Morgenstern       |                              |                         | Faculty of Medicine, Center for Regenerative Therapies Dresden, Technische Universität Dre | Germany, Dresden                                | Clinical Center                                                |                                                                                                   |
| Anne                                           | Schille           |                              |                         | Faculty of Medicine, Center for Regenerative Therapies Dresden, Technische Universität Dre | Germany, Dresden                                | Clinical Center                                                |                                                                                                   |

\*First name, last name, and suffix (if applicable) are required and will appear in PubMed.

| *First Name and Middle Initial(s) | *Last Name     | *Suffix (eg, Jr, III) | Academic Degrees | Institution                                                                                    | Location (city, state/province, country) | Role or Contribution, eg, chair, principal investigator | Group (if more than 1 Group listed in the byline) and/or Subgroup (eg, Steering Committee) |
|-----------------------------------|----------------|-----------------------|------------------|------------------------------------------------------------------------------------------------|------------------------------------------|---------------------------------------------------------|--------------------------------------------------------------------------------------------|
| Maike                             | Sigg           |                       | M.D.             | Faculty of Medicine, Center for Regenerative Therapies Dresden, Technische Universität Dresden | Germany, Dresden                         | Clinical Center                                         |                                                                                            |
| Marc                              | Weigelt        |                       |                  | Faculty of Medicine, Center for Regenerative Therapies Dresden, Technische Universität Dresden | Germany, Dresden                         | Clinical Center                                         |                                                                                            |
| Andre                             | Weise          |                       |                  | Faculty of Medicine, Center for Regenerative Therapies Dresden, Technische Universität Dresden | Germany, Dresden                         | Clinical Center                                         |                                                                                            |
| Nicole                            | Zubizarreta    |                       | R.N.             | Faculty of Medicine, Center for Regenerative Therapies Dresden, Technische Universität Dresden | Germany, Dresden                         | Clinical Center                                         |                                                                                            |
| Thomas                            | Danne          |                       | M.D.             | Children's Hospital AUF DER BULT, Diabetes Centre for Children and Adolescents                 | Germany, Hanover                         | Clinical Center                                         |                                                                                            |
| Laura                             | Galuschka      |                       | Dip. Psych       | Children's Hospital AUF DER BULT, Diabetes Centre for Children and Adolescents                 | Germany, Hanover                         | Clinical Center                                         |                                                                                            |
| Carolin                           | Kruse          |                       | R.N.             | Children's Hospital AUF DER BULT, Diabetes Centre for Children and Adolescents                 | Germany, Hanover                         | Clinical Center                                         |                                                                                            |
| Sarah                             | Landsberg      |                       | M.A.             | Children's Hospital AUF DER BULT, Diabetes Centre for Children and Adolescents                 | Germany, Hanover                         | Clinical Center                                         |                                                                                            |
| Karin                             | Lange          |                       | Ph.D             | Children's Hospital AUF DER BULT, Diabetes Centre for Children and Adolescents                 | Germany, Hanover                         | Clinical Center                                         |                                                                                            |
| Erika                             | Marquardt      |                       | R.N.             | Children's Hospital AUF DER BULT, Diabetes Centre for Children and Adolescents                 | Germany, Hanover                         | Clinical Center                                         |                                                                                            |
| Felix                             | Reschke        |                       | M.D.             | Children's Hospital AUF DER BULT, Diabetes Centre for Children and Adolescents                 | Germany, Hanover                         | Clinical Center                                         |                                                                                            |
| Frank                             | Roloff         |                       | Dip. Biol        | Children's Hospital AUF DER BULT, Diabetes Centre for Children and Adolescents                 | Germany, Hanover                         | Clinical Center                                         |                                                                                            |
| Jantje                            | Weiskorn       |                       | M.D.             | Children's Hospital AUF DER BULT, Diabetes Centre for Children and Adolescents                 | Germany, Hanover                         | Clinical Center                                         |                                                                                            |
| Mareike                           | Polier         |                       | M.D.             | Children's Hospital AUF DER BULT, Diabetes Centre for Children and Adolescents                 | Germany, Hanover                         | Clinical Center                                         |                                                                                            |
| Bianca                            | Schmidt        |                       | R.N.             | Children's Hospital AUF DER BULT, Diabetes Centre for Children and Adolescents                 | Germany, Hanover                         | Clinical Center                                         |                                                                                            |
| Melanie                           | Bunk           |                       |                  | Institute of Diabetes Research, Helmholtz Zentrum München                                      | Germany, Munich                          | Clinical Center                                         |                                                                                            |
| Anna                              | Hofelich       |                       | M.D.             | Institute of Diabetes Research, Helmholtz Zentrum München                                      | Germany, Munich                          | Clinical Center                                         |                                                                                            |
| Elisabeth                         | Huber          |                       | Ph.D             | Institute of Diabetes Research, Helmholtz Zentrum München                                      | Germany, Munich                          | Clinical Center                                         |                                                                                            |
| Melina                            | Kaiser         |                       |                  | Institute of Diabetes Research, Helmholtz Zentrum München                                      | Germany, Munich                          | Clinical Center                                         |                                                                                            |
| Alexandra                         | Käßl           |                       | M.Sc.            | Institute of Diabetes Research, Helmholtz Zentrum München                                      | Germany, Munich                          | Clinical Center                                         |                                                                                            |
| Benjamin                          | Marcus         |                       | M.D.             | Institute of Diabetes Research, Helmholtz Zentrum München                                      | Germany, Munich                          | Clinical Center                                         |                                                                                            |
| Annette                           | Munzinger      |                       | M.Sc.            | Institute of Diabetes Research, Helmholtz Zentrum München                                      | Germany, Munich                          | Clinical Center                                         |                                                                                            |
| Claudia                           | Ramminger      |                       |                  | Institute of Diabetes Research, Helmholtz Zentrum München                                      | Germany, Munich                          | Clinical Center                                         |                                                                                            |
| Franziska                         | Reinmüller     |                       | M.D.             | Institute of Diabetes Research, Helmholtz Zentrum München                                      | Germany, Munich                          | Clinical Center                                         |                                                                                            |
| Veronika                          | Vollmuth       |                       | M.Sc.            | Institute of Diabetes Research, Helmholtz Zentrum München                                      | Germany, Munich                          | Clinical Center                                         |                                                                                            |
| Christiane                        | Winkler        |                       | Ph.D             | Institute of Diabetes Research, Helmholtz Zentrum München                                      | Germany, Munich                          | Clinical Center                                         |                                                                                            |
| Sylwia                            | Dybkowska      |                       |                  | Department of Paediatrics, Medical University of Warsaw                                        | Poland, Warsaw                           | Clinical Center                                         |                                                                                            |
| Lidia                             | Groele         |                       | Ph.D             | Department of Paediatrics, Medical University of Warsaw                                        | Poland, Warsaw                           | Clinical Center                                         |                                                                                            |
| Dorota                            | Owczarek       |                       |                  | Department of Paediatrics, Medical University of Warsaw                                        | Poland, Warsaw                           | Clinical Center                                         |                                                                                            |
| Katarzyna                         | Popko          |                       | Ph.D             | Department of Paediatrics, Medical University of Warsaw                                        | Poland, Warsaw                           | Clinical Center                                         |                                                                                            |
| Adrianna                          | Cieloch        |                       |                  | Department of Paediatrics, Medical University of Warsaw                                        | Poland, Warsaw                           | Clinical Center                                         |                                                                                            |
| Katarzyna                         | Dzygalo        |                       | M.D.             | Department of Paediatrics, Medical University of Warsaw                                        | Poland, Warsaw                           | Clinical Center                                         |                                                                                            |
| Elżbieta                          | Górska         |                       | Ph.D             | Department of Paediatrics, Medical University of Warsaw                                        | Poland, Warsaw                           | Clinical Center                                         |                                                                                            |
| Agnieszka                         | Mroczek        |                       |                  | Department of Paediatrics, Medical University of Warsaw                                        | Poland, Warsaw                           | Clinical Center                                         |                                                                                            |
| Beata                             | Zduńczyk       |                       |                  | Department of Paediatrics, Medical University of Warsaw                                        | Poland, Warsaw                           | Clinical Center                                         |                                                                                            |
| Anna                              | Zych           |                       |                  | Department of Paediatrics, Medical University of Warsaw                                        | Poland, Warsaw                           | Clinical Center                                         |                                                                                            |
| Wiktoria                          | Czerwińska     |                       |                  | Department of Paediatrics, Medical University of Warsaw                                        | Poland, Warsaw                           | Clinical Center                                         |                                                                                            |
| Natalia                           | Dziedzic       |                       |                  | Department of Paediatrics, Medical University of Warsaw                                        | Poland, Warsaw                           | Clinical Center                                         |                                                                                            |
| Hanna                             | Samuelsson     |                       | M.D.             | Department of Clinical Sciences, Lund University/Clinical Research Centre, Skåne University    | Sweden, Malmö                            | Clinical Center                                         |                                                                                            |
| Sofie                             | Alström Mortin |                       | R.N.             | Department of Clinical Sciences, Lund University/Clinical Research Centre, Skåne University    | Sweden, Malmö                            | Clinical Center                                         |                                                                                            |
| Rasmus                            | Bennet         |                       | B.Sc.            | Department of Clinical Sciences, Lund University/Clinical Research Centre, Skåne University    | Sweden, Malmö                            | Clinical Center                                         |                                                                                            |
| Charlotte                         | Brundin        |                       | M.Sc.            | Department of Clinical Sciences, Lund University/Clinical Research Centre, Skåne University    | Sweden, Malmö                            | Clinical Center                                         |                                                                                            |
| Susanne                           | Dahlberg       |                       | R.N.             | Department of Clinical Sciences, Lund University/Clinical Research Centre, Skåne University    | Sweden, Malmö                            | Clinical Center                                         |                                                                                            |
| Lina                              | Fransson       |                       | B.Sc.            | Department of Clinical Sciences, Lund University/Clinical Research Centre, Skåne University    | Sweden, Malmö                            | Clinical Center                                         |                                                                                            |

\*First name, last name, and suffix (if applicable) are required and will appear in PubMed.

| *First Name and Middle Initial(s) | *Last Name       | *Suffix (eg, Jr, III) | Academic Degrees | Institution                                                                                 | Location (city, state/province, country) | Role or Contribution, eg, chair, principal investigator | Group (if more than 1 Group listed in the byline) and/or Subgroup (eg, Steering Committee) |
|-----------------------------------|------------------|-----------------------|------------------|---------------------------------------------------------------------------------------------|------------------------------------------|---------------------------------------------------------|--------------------------------------------------------------------------------------------|
| Ida                               | Jönsson          |                       | M.Sc.            | Department of Clinical Sciences, Lund University/Clinical Research Centre, Skåne University | Sweden, Malmö                            | Clinical Center                                         |                                                                                            |
| Hannah                            | Nenonen          |                       | Ph.D             | Department of Clinical Sciences, Lund University/Clinical Research Centre, Skåne University | Sweden, Malmö                            | Clinical Center                                         |                                                                                            |
| Anita                             | Ramelius         |                       | M.Sc.            | Department of Clinical Sciences, Lund University/Clinical Research Centre, Skåne University | Sweden, Malmö                            | Clinical Center                                         |                                                                                            |
| Carina                            | Törn             |                       | Ph.D             | Department of Clinical Sciences, Lund University/Clinical Research Centre, Skåne University | Sweden, Malmö                            | Clinical Center                                         |                                                                                            |
| Ulrika                            | Ulvenhag         |                       | R.N.             | Department of Clinical Sciences, Lund University/Clinical Research Centre, Skåne University | Sweden, Malmö                            | Clinical Center                                         |                                                                                            |
| Marielle                          | Lindström        |                       | B.Sc.            | Department of Clinical Sciences, Lund University/Clinical Research Centre, Skåne University | Sweden, Malmö                            | Clinical Center                                         |                                                                                            |
| Kobra                             | Rhamati          |                       | B.Sc.            | Department of Clinical Sciences, Lund University/Clinical Research Centre, Skåne University | Sweden, Malmö                            | Clinical Center                                         |                                                                                            |
| Malin                             | Goldman Tsubarah |                       | B.Sc.            | Department of Clinical Sciences, Lund University/Clinical Research Centre, Skåne University | Sweden, Malmö                            | Clinical Center                                         |                                                                                            |
| Falastin                          | Salami           |                       | Ph.D             | Department of Clinical Sciences, Lund University/Clinical Research Centre, Skåne University | Sweden, Malmö                            | Clinical Center                                         |                                                                                            |
| Sophia                            | Hawkins          |                       | R.N.             | Department of Paediatrics, NIHR Oxford Biomedical Research Centre, University of Oxford     | UK, Oxford                               | Clinical Center                                         |                                                                                            |
| Yama F                            | Mujadidi         |                       | M.Sc.            | Department of Paediatrics, NIHR Oxford Biomedical Research Centre, University of Oxford     | UK, Oxford                               | Clinical Center                                         |                                                                                            |
| Ian                               | Smith            |                       |                  | Department of Paediatrics, NIHR Oxford Biomedical Research Centre, University of Oxford     | UK, Oxford                               | Clinical Center                                         |                                                                                            |
| Fenella                           | Roseman          |                       |                  | Department of Paediatrics, NIHR Oxford Biomedical Research Centre, University of Oxford     | UK, Oxford                               | Clinical Center                                         |                                                                                            |
| Hannah                            | Robinson         |                       | R.N.             | Department of Paediatrics, NIHR Oxford Biomedical Research Centre, University of Oxford     | UK, Oxford                               | Clinical Center                                         |                                                                                            |
| Nazia                             | Taj              |                       |                  | Department of Paediatrics, NIHR Oxford Biomedical Research Centre, University of Oxford     | UK, Oxford                               | Clinical Center                                         |                                                                                            |
| Conor                             | Whelan           |                       | B.Sc.            | Department of Paediatrics, NIHR Oxford Biomedical Research Centre, University of Oxford     | UK, Oxford                               | Clinical Center                                         |                                                                                            |
| Tabitha                           | Wishlade         |                       |                  | Department of Paediatrics, NIHR Oxford Biomedical Research Centre, University of Oxford     | UK, Oxford                               | Clinical Center                                         |                                                                                            |
| Sophie                            | Vernon           |                       | B.Sc.            | Department of Paediatrics, NIHR Oxford Biomedical Research Centre, University of Oxford     | UK, Oxford                               | Clinical Center                                         |                                                                                            |
| Helen                             | Ratcliffe        |                       | MBBS, MRC        | Department of Paediatrics, NIHR Oxford Biomedical Research Centre, University of Oxford     | UK, Oxford                               | Clinical Center                                         |                                                                                            |
