# Supplementary material
Source: PubMed Central journal article supplement (PMC10523173)
Supplement: jama-e2316348-s003.pdf [file jama-e2316348-s003.pdf]

## Data Sharing Statement

Lugar. SARS-CoV-2 Infection and Development of Islet Autoimmunity in Early Childhood. *JAMA*. Published September 08, 2023. doi:10.1001/jama.2023.16348

### Data

**Data available:** Yes

**Data types:** Deidentified participant data

**How to access data:** Requests can be made to [cc@gppad.org](mailto:cc@gppad.org)

**When available:** beginning date: 03-01-2024

### Supporting Documents

**Document types:** None

### Additional Information

**Who can access the data:** Researchers whose proposed use of the data has been approved

**Types of analyses:** Requests for data for a specified purpose .

**Mechanisms of data availability:** Data will be made available after approval of a proposal and after a signed Data Transfer Agreement
